# Supplementary material
Source: PubMed Central journal article supplement (PMC7698828)

Figure S1. Funnel plot for assessing reporting bias for mean incubation period

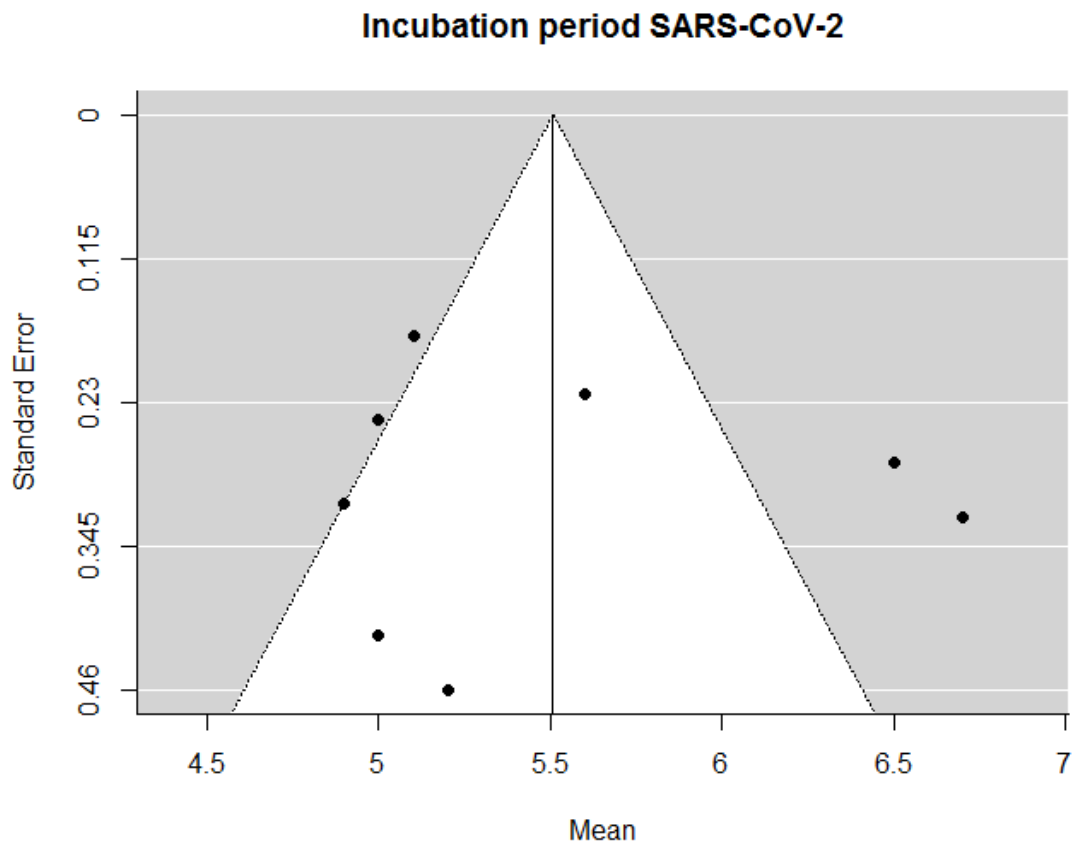

Figure S2. Funnel plot for assessing reporting bias for the 95%tile of the incubation period distribution

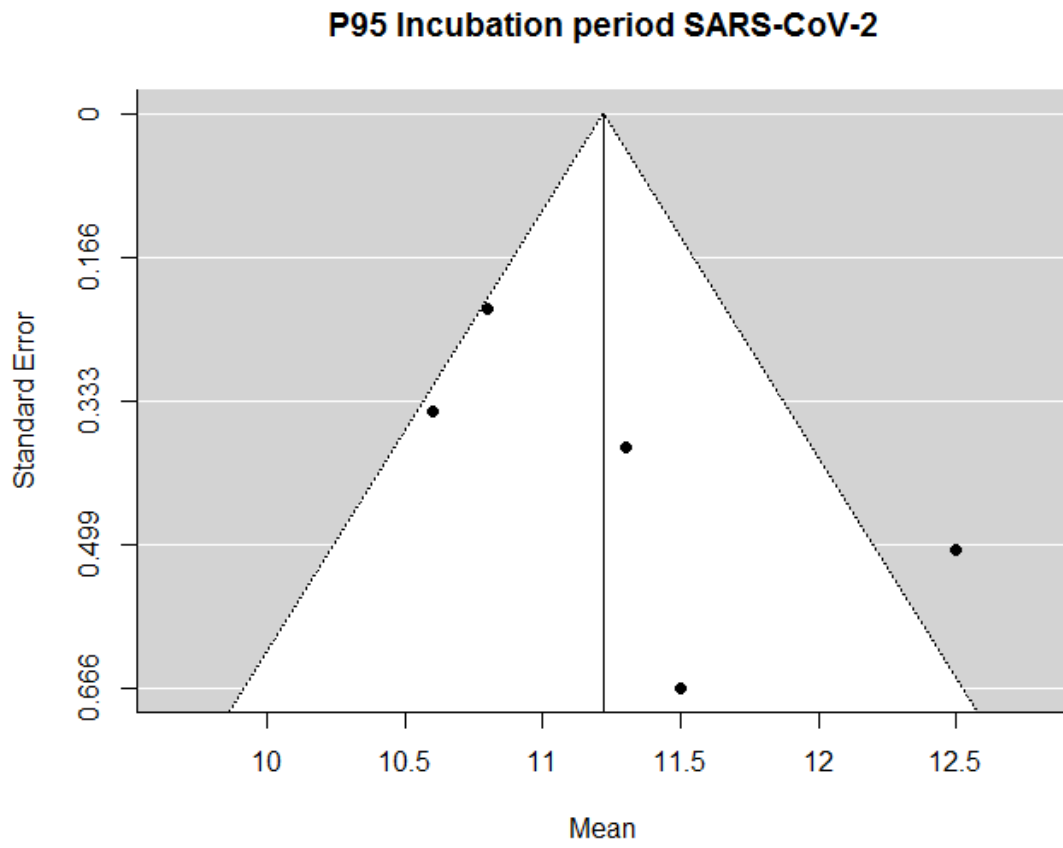

Supplement: mmc1.pdf [file mmc1.pdf]
